# Supplementary material for: Exploring Information Systems Curricula
Source: Springer Nature journal article supplement (doi:10.1007/s12599-021-00702-2), 2021-06-15
Supplement: MOESM1 [file 19263884]

# **Exploring Information Systems Curricula – A Text Mining Approach**

**Patrick Föll, Frédéric Thiesse**

Business & Information Systems Engineering (2021)

**Appendix (available online via <http://link.springer.com>)**

## Appendix I: Considered German IS study programs

**1: institution name, 2: type of institution (UAS = university of applied sciences, Uni = university); 3: study type (F = full-time, DL = distance learning, D = dual), 4: type of degree (B = Bachelor's, M = Master's)**

| 1                                                                           | 2   | 3  | 4 |
|-----------------------------------------------------------------------------|-----|----|---|
| Hochschule Aalen - Technik und Wirtschaft                                   | UAS | F  | M |
| Hochschule Albstadt-Sigmaringen                                             | UAS | F  | B |
| International University of Applied Sciences Bad Honnef - Bonn              | UAS | DL | M |
| Otto-Friedrich-Universität Bamberg                                          | Uni | DL | M |
| Beuth Hochschule für Technik Berlin                                         | UAS | DL | B |
| Hochschule für Technik und Wirtschaft Berlin                                | UAS | F  | M |
| Fachhochschule Bielefeld                                                    | UAS | F  | B |
| Fachhochschule Bielefeld                                                    | UAS | F  | M |
| Hochschule Bonn-Rhein-Sieg, University of Applied Sciences                  | UAS | F  | B |
| Technische Hochschule Brandenburg                                           | UAS | F  | B |
| Technische Hochschule Brandenburg                                           | UAS | F  | M |
| Technische Universität Carolo-Wilhelmina zu Braunschweig                    | Uni | F  | B |
| Hochschule Bremerhaven                                                      | UAS | F  | B |
| Technische Universität Clausthal                                            | Uni | F  | B |
| Technische Universität Darmstadt                                            | Uni | F  | B |
| Technische Universität Darmstadt                                            | Uni | F  | M |
| Fachhochschule Dortmund                                                     | UAS | F  | M |
| Fachhochschule Dortmund (distance learning)                                 | UAS | DL | M |
| Fachhochschule Dortmund (compound study)                                    | UAS | DL | M |
| Fachhochschule Dortmund (with internship)                                   | UAS | F  | B |
| Fachhochschule Dortmund                                                     | UAS | F  | B |
| Fachhochschule Dortmund (compound study)                                    | UAS | DL | B |
| Universität Duisburg-Essen                                                  | Uni | F  | B |
| Universität Duisburg-Essen                                                  | Uni | F  | B |
| Nordakademie - staatlich anerkannte private Fachhochschule                  | UAS | D  | B |
| Nordakademie - staatlich anerkannte private Fachhochschule                  | UAS | D  | M |
| Hochschule Emden/Leer                                                       | UAS | DL | B |
| Hochschule Flensburg                                                        | UAS | F  | B |
| Hochschule Furtwangen - Informatik, Technik, Wirtschaft, Medien, Gesundheit | UAS | F  | B |
| FernUniversität in Hagen                                                    | Uni | DL | M |
| FernUniversität in Hagen                                                    | Uni | DL | B |
| Martin-Luther-Universität Halle-Wittenberg                                  | Uni | F  | B |
| Martin-Luther-Universität Halle-Wittenberg                                  | Uni | F  | M |
| Hochschule Hannover                                                         | UAS | F  | B |
| Hochschule Heilbronn, Technik, Wirtschaft, Informatik                       | UAS | F  | B |
| Universität Hildesheim                                                      | Uni | F  | B |
| Hochschule für Angewandte Wissenschaften Hof                                | UAS | F  | B |
| Technische Universität Ilmenau                                              | Uni | F  | B |
| Friedrich-Schiller-Universität Jena                                         | Uni | F  | M |
| Hochschule Karlsruhe - Technik und Wirtschaft                               | UAS | F  | B |
| Hochschule Karlsruhe - Technik und Wirtschaft                               | UAS | F  | M |
| Hochschule für angewandte Wissenschaften Kempten                            | UAS | F  | B |
| Fachhochschule Kiel                                                         | UAS | F  | B |
| Fachhochschule Kiel                                                         | UAS | DL | B |

|                                                                            |     |    |   |
|----------------------------------------------------------------------------|-----|----|---|
| Technische Hochschule Köln                                                 | UAS | F  | B |
| Hochschule Konstanz Technik, Wirtschaft und Gestaltung                     | UAS | F  | B |
| Hochschule Landshut - Hochschule für angewandte Wissenschaften             | UAS | F  | B |
| Hochschule für Telekommunikation Leipzig                                   | UAS | D  | M |
| Hochschule für Telekommunikation Leipzig                                   | UAS | F  | B |
| Hochschule für Telekommunikation Leipzig                                   | UAS | D  | B |
| Hochschule Ludwigshafen am Rhein                                           | UAS | F  | B |
| Hochschule Ludwigshafen am Rhein                                           | UAS | F  | M |
| Hochschule Mannheim                                                        | UAS | F  | B |
| Universität der Bundeswehr München                                         | Uni | F  | B |
| Universität der Bundeswehr München                                         | Uni | F  | M |
| Fachhochschule Münster                                                     | UAS | F  | M |
| Fachhochschule Münster                                                     | UAS | F  | B |
| Hochschule Niederrhein                                                     | UAS | F  | M |
| Hochschule Niederrhein                                                     | UAS | D  | B |
| Technische Hochschule Nürnberg Georg Simon Ohm                             | UAS | F  | B |
| Technische Hochschule Nürnberg Georg Simon Ohm                             | UAS | F  | M |
| Hochschule für Technik, Wirtschaft und Medien Offenburg                    | UAS | F  | B |
| Hochschule Braunschweig/Wolfenbüttel, Ostfalia Hochschule                  | UAS | DL | M |
| Hochschule Braunschweig/Wolfenbüttel, Ostfalia Hochschule                  | UAS | F  | B |
| Hochschule Braunschweig/Wolfenbüttel, Ostfalia Hochschule                  | UAS | DL | B |
| Fachhochschule der Wirtschaft Paderborn                                    | UAS | F  | B |
| Hochschule Pforzheim - Gestaltung, Technik, Wirtschaft und Recht           | UAS | F  | B |
| Hochschule Ravensburg-Weingarten                                           | UAS | F  | M |
| Hochschule Ravensburg-Weingarten                                           | UAS | F  | B |
| Hochschule Reutlingen, Hochschule für Technik-Wirtschaft-Informatik-Design | UAS | F  | M |
| Hochschule Reutlingen, Hochschule für Technik-Wirtschaft-Informatik-Design | UAS | F  | B |
| Hochschule für angewandte Wissenschaften - Fachhochschule Rosenheim        | UAS | F  | B |
| Hochschule Ruhr West - University of Applied Sciences                      | UAS | D  | B |
| Hochschule Ruhr West - University of Applied Sciences                      | UAS | F  | B |
| Universität Siegen                                                         | Uni | F  | B |
| Universität Siegen                                                         | Uni | D  | B |
| Universität Siegen                                                         | Uni | F  | M |
| Fachhochschule Stralsund                                                   | UAS | F  | M |
| Fachhochschule Stralsund                                                   | UAS | F  | B |
| Duale Hochschule Baden-Württemberg                                         | UAS | D  | B |
| Hochschule für Technik Stuttgart                                           | UAS | F  | B |
| Universität Stuttgart                                                      | Uni | F  | B |
| Fachhochschule Südwestfalen                                                | UAS | F  | B |
| Universität Trier                                                          | Uni | F  | B |
| Fachhochschule Wedel                                                       | UAS | F  | B |
| Pädagogische Hochschule Weingarten                                         | UAS | F  | B |
| Hochschule Weserbergland                                                   | UAS | D  | B |
| Westfälische Hochschule Gelsenkirchen, Bocholt, Recklinghausen             | UAS | F  | B |
| Jade Hochschule - Wilhelmshaven/Oldenburg/Elsfleth                         | UAS | F  | B |
| Hochschule Wismar - University of Applied Sciences (binational program)    | UAS | F  | B |
| Hochschule Wismar - University of Applied Sciences                         | UAS | DL | B |
| Hochschule Wismar - University of Applied Sciences                         | UAS | F  | B |
| Hochschule Worms, University of Applied Sciences                           | UAS | F  | B |

## Appendix II: Overview of identified topics

| Skill area          | Topic                               | Top 10 words                                                                                                                                           | Top 10 modules (module topic share)                                                                                                                                                                                                                                                                                                                                                                                                                                                                                                                                                                                                                                                                                           |
|---------------------|-------------------------------------|--------------------------------------------------------------------------------------------------------------------------------------------------------|-------------------------------------------------------------------------------------------------------------------------------------------------------------------------------------------------------------------------------------------------------------------------------------------------------------------------------------------------------------------------------------------------------------------------------------------------------------------------------------------------------------------------------------------------------------------------------------------------------------------------------------------------------------------------------------------------------------------------------|
| Information systems | fundamentals of information systems | betrieb<br>wirtschaftsinformat<br>informationssystem<br>anwendungssystem<br>anwend entwickl<br>betriebswirtschaft gestalt<br>integriert information    | Grundlagen betrieblicher Anwendungssysteme (0.97);<br>Ausgewählte Themen der Modellierung betrieblicher Informationssysteme (0.93); Ausgewählte Themen der Realisierung betrieblicher Informationssysteme (0.93);<br>Ausgewählte Themen der Technik und Sicherheit betrieblicher Kommunikationssysteme (0.93); Ausgewählte Themen der Modellierung betrieblicher Informationssysteme (0.93);<br>Ausgewählte Themen der Realisierung betrieblicher Informationssysteme (0.93); Ausgewählte Themen der Technik und Sicherheit betrieblicher Kommunikationssysteme (0.93);<br>Ausgewählte Themen des E-Entrepreneurships (0.9);<br>Ausgewählte Themen des E-Entrepreneurships (0.9);<br>Wirtschaftsinformatik Grundlagen (0.87); |
|                     | project management                  | projektmanagement<br>projekt method<br>risikomanagement<br>qualitaetsmanagement<br>projektplan itprojekt<br>planung<br>projektorganisation<br>werkzeug | Projektmanagement (0.98); Projektmanagement (0.98);<br>Projektmanagement (0.97); Projektmanagement (0.97);<br>Projektmanagement (0.97); Projektmanagement (0.95);<br>Fortgeschrittenes Projektmanagement (0.95); Fortgeschrittenes Projektmanagement (0.95); IT-Projektmanagement (0.92); IT-Projektmanagement (0.92);                                                                                                                                                                                                                                                                                                                                                                                                        |
|                     | IT management                       | method itgovernanc<br>itmanagement prozess<br>unternehm itcontrolling<br>anlysi informat umsetz<br>itservicemanagement                                 | Einführung in das IT-Management (0.79); IT-Governance (0.79); IT-Governance (0.79); IT Service Management (0.74);<br>IT-GRC (IT-Governance, Risk & Compliance) (0.72); IT-Management (0.7); IT-Management - IT-Service- & Supply Chain-Management (0.68); IT-Servicemanagement (0.67);<br>Unternehmens-Software 2 (0.65); IT-Management (0.64);                                                                                                                                                                                                                                                                                                                                                                               |
|                     | IT service management               | servic management<br>standard digital<br>architektur technologi soa<br>anforder itil<br>cloudcomputing                                                 | Systemintegration II - Serversysteme (0.9); IT-Consulting II: Serversysteme (0.9); IT-Servicemanagement I (0.8); IT-Servicemanagement (0.71); IT-Servicemanagement (0.71);<br>Softwarearchitektur (0.7); Verteilte Systeme (Technik) (0.68);<br>Cloud Computing (0.68); IT-Infrastrukturmanagement (0.66);<br>IT-Services (0.66);                                                                                                                                                                                                                                                                                                                                                                                             |
|                     | e-business                          | ebusiness elektron<br>internet digital business<br>geschaefstmodell medi<br>neu ecommerc technologi                                                    | E-Tourismus - moderne IT-Anwendungen imTourismus (0.98);<br>E-Tourismus - moderne IT-Anwendungen imTourismus (0.98);<br>E-Business (0.96); E-Business (0.96); Einführung in E-Business (0.89); Einführung in E-Business (0.89); Realisierung von E-Business-Anwendungen (0.88); Realisierung von E-Business-Anwendungen (0.88);<br>Electronic Markets and Electronic Commerce (0.77); E-Business Management (0.77);                                                                                                                                                                                                                                                                                                           |
|                     | process management                  | geschaefstprozess<br>modellier method prozess<br>geschaefstprozessmanage<br>ment modell analys<br>anwend<br>geschaefstprozessmodellier<br>er bpmn      | Geschäftsprozesse / Prozessmodellierung (0.94);<br>Geschäftsprozesse / Prozessmodellierung (0.94); Grundlagen des Geschäftsprozessmanagement (0.88); Grundlagen des Geschäftsprozessmanagement (0.88);<br>Geschäftsprozess-Management (0.83); Geschäftsprozess-Management (0.83);<br>Geschäftsprozessmanagement (0.82); Unternehmens- und Geschäftsprozessmodellierung (0.82);<br>Geschäftsprozessmanagement (0.76); Business Engineering (0.76);                                                                                                                                                                                                                                                                             |

|                        |                                         |                                                                                                                                            |                                                                                                                                                                                                                                                                                                                                                                                                                                                                                                                                                                                                                                                               |
|------------------------|-----------------------------------------|--------------------------------------------------------------------------------------------------------------------------------------------|---------------------------------------------------------------------------------------------------------------------------------------------------------------------------------------------------------------------------------------------------------------------------------------------------------------------------------------------------------------------------------------------------------------------------------------------------------------------------------------------------------------------------------------------------------------------------------------------------------------------------------------------------------------|
| Information systems    | ERP systems                             | erpsystem<br>geschaefitsprozess sap<br>prozess integriert erp<br>betriebswirtschaft<br>standardsoftwar anpass<br>saperp                    | ERP-Systeme (0.93); ERP 1 (0.91); ERP 1 (0.91); Integration von Finanz- und Auftragsprozessen in ERP-Systemen (0.89); Geschäftsprozessintegration mit MS Navision (0.89); Standardanwendungssoftware (0.88); Standardanwendungssoftware (0.88); Einführung in ERP-Systeme (0.87); Einführung SAP ERP (0.86); ERP-Architekturen (0.86);                                                                                                                                                                                                                                                                                                                        |
|                        | operations research                     | optimier modell loesung<br>linear method problem<br>operationsresearch<br>mathemat verfahren anwend                                        | Operations Research (0.95); Operations Research (0.94); Operations Research (0.94); Operations Research mit Anwendungen in der Energiewirtschaft (0.93); Operations Research mit Anwendungen in der Energiewirtschaft (0.93); Operations Research (0.91); Operations Research (0.91); Problemlösen in graphischen Strukturen (0.89); Operations Research (0.88); Operations Research (0.88);                                                                                                                                                                                                                                                                  |
|                        | logistical optimization models          | verfahren modell bild<br>mathemat anwend technik<br>bildverarbeit problem<br>objekt dynam                                                  | Logistikmanagement Wpf (0.98); Logistikmanagement Wpf (0.98); Logistikmanagement (0.98); Logistikmanagement (0.98); 1489 Visual Computing (0.97); 1152 Visual Computing (erweitert) (0.96); Computergraphik I (0.78); 1150 Geoinformatik und Visual Computing (0.75); 1027 Geoinformatik und Visual Computing (0.75); Grundlagen der Computergraphik (0.74);                                                                                                                                                                                                                                                                                                  |
|                        | business intelligence                   | informationsmanagement<br>management information<br>method dat datawarehous<br>businessintelligenc<br>entwickl bi aktuell                  | Informationswirtschaft (0.92); Informationswirtschaft (0.92); Informationsmanagement (0.9); Informations- und Business Performance Management (0.88); Informations- und Business Performance Management (0.88); Business Intelligence (0.88); Einführung in Business Intelligence (0.86); Business Intelligence (0.84); Strategisches Informationsmanagement (0.84); Data Warehousing und Business Intelligence (0.83);                                                                                                                                                                                                                                       |
|                        | data analytics                          | method anwend komplex<br>datamining verfahren web<br>information analyt netz<br>maschinell                                                 | 1231 Data Mining und IT- basierte Entscheidungsunterstützung (0.91); 1231 Data Mining und IT- basierte Entscheidungsunterstützung (0.91); Einführung in Data Mining (0.84); Business Intelligence (0.8); Business Intelligence (0.76); Information Retrieval und Visualisierung (0.71); Data Mining (0.68); Maschinelles Lernen (0.68); Informationsmanagement (0.67); Vertiefende Themen des CRM (0.66);                                                                                                                                                                                                                                                     |
| Business and economics | fundamentals of business administration | betriebswirtschaft<br>betriebswirtschaftslehr<br>betrieb entscheid<br>unternehmen bwl steu<br>funktion investition<br>oekonom              | Grundzüge der Unternehmensbesteuerung (0.96); Grundzüge der Unternehmensbesteuerung (0.96); Grundlagen der Besteuerung und des Instrumentariums (0.96); Grundlagen der Besteuerung und des Instrumentariums (0.96); Wirtschaftswissenschaftliche Grundlagen - Einführung in die BWL für Wirtschaftswissenschaftler (0.94); Steuerliche Gewinn- und Vermögensermittlung, konstitutive (0.93); Steuerliche Gewinn- und Vermögensermittlung, konstitutive (0.93); Grundlagen der BWL (0.91); Grundlagen der Betriebswirtschaftslehre (0.89); Einführung in die Wirtschaftswissenschaften - Einführung in die BWL für Ingenieure und Naturwissenschaftler (0.86); |
|                        | fundamentals of economics               | volkswirtschaft<br>volkswirtschaftslehr<br>oekonom wirtschaftspolit<br>makrooekonom<br>international analys<br>geldpolit theori wirtschaft | Volkswirtschaftslehre (0.94); VWL Mikroökonomie (0.92); VWL Mikroökonomie (0.92); Ökonomie der Umweltpolitik (0.9); Ökonomie der Umweltpolitik (0.9); Geld, Finanzmärkte und wirtschaftliche Entwicklung (0.9); Angewandte Mikro- und Makroökonomie (0.9); Angewandte Mikro- und Makroökonomie (0.9); VWL für WI (0.9); Volkswirtschaftslehre (0.89);                                                                                                                                                                                                                                                                                                         |

|                        |                                   |                                                                                                                                         |                                                                                                                                                                                                                                                                                                                                                                                                                                                 |
|------------------------|-----------------------------------|-----------------------------------------------------------------------------------------------------------------------------------------|-------------------------------------------------------------------------------------------------------------------------------------------------------------------------------------------------------------------------------------------------------------------------------------------------------------------------------------------------------------------------------------------------------------------------------------------------|
| Business and economics | production and logistics          | logist produktion<br>produktionsplan planung<br>supplychainmanagement<br>beschaff steuer<br>supplychain method<br>produktionsmanagement | Produktionsmanagement (0.94); Produktionsmanagement (0.94); Produktionswirtschaft 2 (0.91); Produktion und Logistik (0.89); Produktion und Logistik (0.88); Vertiefende Themen des Supply Chain Managements (0.87); Logistik/Supply Chain Management (0.83); Produktionsplanung und -steuerung (0.82); Produktion und Logistik (0.82); Produktion und Logistik (0.82);                                                                          |
|                        | marketing and sales               | marketing instrument<br>marktforsch<br>onlinemarketing method<br>vertrieb produkt<br>international anwend<br>marketingmix               | Marketing - Grundlagen und empirische Sozialforschung (0.95); Marketing (0.95); Marketing (0.95); Marketing (0.95); Marktforschung und Sektorales Marketing (0.9); Marktforschung und Sektorales Marketing (0.9); Marketing (0.86); Marketing (0.84); Marketing (0.84);                                                                                                                                                                         |
|                        | human resources and organization  | organisation fuehrung<br>management unternehm<br>gestalt personalwirtschaft<br>verhalt theori<br>personalmanagement<br>international    | Organisation: Theorie, Gestaltung, Wandel (0.96); Organisation: Theorie, Gestaltung, Wandel (0.96); Personalwesen (0.9); Personalwesen (0.9); Personalführung (0.89); Personalführung (0.89); Personalführung und Personalmanagementsysteme (0.86); Verhalten in Organisationen (0.85); Verhalten in Organisationen (0.85); Mitarbeiterführung (0.81);                                                                                          |
|                        | corporate management and strategy | unternehm management<br>entwickl prozess strategi<br>strateg wirtschaft<br>organisation analysi<br>umsetz                               | Wirtschafts- und Unternehmensethik (0.73); Wirtschafts- und Unternehmensethik (0.73); Ethik der Wirtschaftsinformatik (0.73); Ethik und gesellschaftliche Verantwortung (0.72); Corporate Governance & Strategisches Management (0.71); Social Relationship Management (0.7); Wirtschaftsethik globaler Herausforderungen (0.7); Marketing I: Global Branding (0.68); Wirtschaft und Ethik (0.67); 1212 User Centric R and D Management (0.67); |
|                        | entrepreneurship and innovation   | innovation net dienstleist<br>economy<br>unternehmensgruend<br>innovationsmanagement<br>gestalt method<br>management erfolgfsfaktor     | Autorensysteme (0.93); Autorensysteme (0.93); Autorensysteme (0.93); E-Entrepreneurship (0.92); Dienstleistungskonzeptionen (0.88); Dienstleistungskonzeptionen (0.87); Innovationsmanagement (0.83); Innovationsmanagement (0.83); 1156 Entwicklung von Geschäftsmodellen (0.82); 1156 Entwicklung von Geschäftsmodellen (0.82);                                                                                                               |
|                        | cost accounting                   | kost rechnungswes<br>kostenrechn<br>leistungsrechn intern<br>kostentraegerrechn<br>erloesrechn betrieb<br>method<br>kostenstellenrechn  | Kosten- und Erlösrechnung (0.98); Unternehmensrechnung I - Kosten- und Leistungsrechnung (0.95); Rechnungswesen und Controlling I (0.94); Internes Rechnungswesen (0.93); Kostenrechnung (0.92); Kosten- und Leistungsrechnung (0.89); Rechnungswesen 2 (0.88); Kosten- und Erlösrechnung (0.88); Interne Unternehmensrechnung (0.88); Internes Rechnungswesen (0.87);                                                                          |
|                        | financial accounting              | jahresabschluss buchfuehr<br>bilanz hgb ifr<br>rechnungswes bilanzier<br>rechnungsleg international<br>geschaefstvorfiaell              | Buchführung Jahresabschluss (0.95); Buchführung und Jahresabschluss (0.95); Externes Rechnungswesen (0.94); Jahresabschluss nach HGB und IFRS (0.93); Jahresabschluss nach HGB und IFRS (0.93); Wirtschaftsprüfung (0.93); Externes Rechnungswesen (0.92); Konzernrechnungslegung (0.91); Konzernrechnungslegung (0.91); Externes Rechnungswesen (0.87);                                                                                        |
|                        | investment and finance            | finanzier investition<br>investitionsrechn<br>finanzwirtschaft<br>unternehm beurteil<br>method verfahr<br>instrument theoret            | Investitions- und Finanzmanagement II (0.95); Immobilienwirtschaft und Finanzierung (0.94); Finanzierung und Investitionsrechnung (0.91); Investition und Finanzierung (0.9); Unternehmensrechnung II - Investition und Finanzierung (0.9); Finanzierung (0.89); Finanzmanagement (0.88); Finanzmanagement (0.88); Finanzierung und Investition (0.86); Investition und Finanzierung (0.83);                                                    |
|                        | management accounting             | controlling strateg<br>instrument planung<br>unternehmensfuehr<br>management operativ<br>analys kennzahl method                         | Controlling (0.97); Controlling (0.91); Controlling (0.91); Controlling (0.87); Planung: Theorien, Strategien, Instrumente (0.87); Controlling (0.87); Planung: Theorien, Strategien, Instrumente (0.87); Controlling (0.86); Innovationscontrolling (0.82); Innovationscontrolling (0.82);                                                                                                                                                     |

|                  |                                             |                                                                                                                     |                                                                                                                                                                                                                                                                                                                                                                                                                              |
|------------------|---------------------------------------------|---------------------------------------------------------------------------------------------------------------------|------------------------------------------------------------------------------------------------------------------------------------------------------------------------------------------------------------------------------------------------------------------------------------------------------------------------------------------------------------------------------------------------------------------------------|
| Computer science | algorithms and data structures              | algorithm datenstruktur graph baum komplexitaet list sorti analys effizient anwend                                  | Algorithmen und Datenstrukturen (0.98); Algorithmen und Datenstrukturen (0.96); Algorithmen und Datenstrukturen (0.93); Algorithmen und Datenstrukturen (0.93); Algorithmen und Datenstrukturen (0.93); Algorithmen und Datenstrukturen (0.93); Algorithmen und Datenstrukturen (0.92); Algorithmen und Datenstrukturen (0.92); Algorithmen und Datenstrukturen (0.91); Algorithmen und Datenstrukturen 0.89);               |
|                  | software development                        | method softwar anforder softwareentwickl uml anwend objektorientiert design entwickl analys                         | Softwaretechnik (0.93); Betriebliche Softwareentwicklung (0.93); Software-Engineering (0.92); Software-Engineering (0.92); Softwarequalitätssicherung (0.91); Software-Qualität (0.9); Softwaretechnik I (0.9); Softwaretechnik I (0.9); Requirements-Engineering and -Management (0.89); Softwaretechnik (0.89);                                                                                                            |
|                  | programming and testing                     | programmier objektorientiert programmiersprach java programm klass method programmi datentyp objekt                 | Programmierung II (0.95); Einführung in die Programmierung (0.95); Programmierung C++ (0.95); Programmierung C++ (0.95); Objektorientierte Programmierung (0.95); Objektorientierte Programmierung I (0.95); Grundlagen der Programmierung (0.94); Einführung in die Programmierung (0.94); Programmieren II (0.93); Grundlagen der Programmierung I (0.92);                                                                 |
|                  | web programming                             | webanwend anwend xml technologi web html erstell technik internet entwickl                                          | Künstliche Intelligenz (0.96); Künstliche Intelligenz (0.96); Fortgeschrittenes Web-Engineering (0.95); Fortgeschrittenes Web-Engineering (0.95); Web-Engineering (0.95); Web-Engineering (0.95); Web und Multimediatechnologien (0.92); Web und Multimediatechnologien (0.92); Anwendungen der Künstlichen Intelligenz Lehrveranstaltung(en) B095a Anwendungen der Künstlichen Intelligenz (0.91); Web-Entwicklung I (0.9); |
|                  | theoretical computer science                | informat sprach automat formal theoret modell regula endlich grammat problem                                        | Theoretische Informatik (0.97); Logik und Verifikation (0.92); Theoretische Informatik (0.92); Grundlagen der Theoretischen Informatik Lehrveranstaltung(en) B022a Grundlagen der Theoretischen Informatik (0.9); Compiler (0.9); Automatentheorie und Formale Sprachen (0.89); DSL-Engineering (0.84); DSL-Engineering (0.84); Modelle der Informatik (0.84); Modelle der Informatik (0.84);                                |
|                  | operating systems and computer architecture | betriebssystem aufbau rechn prozess rechnerarchitektur architektur modern komponent hardwar speich                  | Betriebssysteme (0.94); Rechnerarchitektur und Betriebssysteme (0.91); IT-Systeme (0.89); Einführung in Betriebssysteme (0.89); Einführung in Rechnerarchitektur (0.86); Betriebssysteme (0.85); Betriebssysteme (0.84); Betriebssysteme und Rechnerarchitektur (0.82); Rechnerarchitekturen und Betriebssysteme (0.82); Großrechner und Cobol-Programmierung I (0.81);                                                      |
|                  | databases                                   | datenbank relational sql datenbanksystem datenmodell datenbankentwurf anwend datenmodellier modell objektrelational | Datenbanksysteme (0.96); Datenbanksysteme (0.96); Datenbanken 1 (0.95); Datenbanken 1 (0.95); Datenbankmanagementsysteme (0.92); Datenbankmanagementsysteme (0.92); Datenbanken (0.92); Datenbanken und Datenmodellierung (0.9); Datenbanken (0.9); Datenbanken (0.87);                                                                                                                                                      |
|                  | computer networks and network technologies  | protokoll netz rechnernetz internet kommunikation netzwerk ipv routing aufbau schicht                               | Kommunikationsnetze 1 (0.98); Kommunikationsnetze 1 (0.98); Rechnernetze I (0.93); Grundlagen der Rechnernetze (0.93); Rechnernetzwerke (0.9); Netze und Datenintegrität (0.9); Netze und Datenintegrität (0.9); Kommunikations- und Rechnernetze (0.9); Kommunikations- und Rechnernetze (0.9); Rechnernetze (0.9);                                                                                                         |

|                              |                                          |                                                                                                                          |                                                                                                                                                                                                                                                                                                                                                                                                                                                                                        |
|------------------------------|------------------------------------------|--------------------------------------------------------------------------------------------------------------------------|----------------------------------------------------------------------------------------------------------------------------------------------------------------------------------------------------------------------------------------------------------------------------------------------------------------------------------------------------------------------------------------------------------------------------------------------------------------------------------------|
| Computer science             | information and communication technology | protocol mobilfunkssystem<br>zuverlaess voip<br>generation struktur<br>medizin ittool ausdrueck<br>regula                | Zuverlässigkeit von Hardware und Software (0.8);<br>Zuverlässigkeit von Hardware und Software (0.8);<br>Informationssysteme im Gesundheitswesen (0.8);<br>Informationssysteme im Gesundheitswesen (0.8);<br>Fehlertolerante verteilte Systeme (0.76); Fehlertolerante verteilte Systeme (0.76); Verkehrs, Leit und Steuerungssysteme (0.71); Verkehrs, Leit und Steuerungssysteme (0.71);<br>Medizinische Basisdiagnostik (0.69);<br>eHealth und Ambient Assisted Living (AAL) (0.68); |
|                              | distributed systems                      | verteilt anwend<br>architektur kooperativ<br>kommunikation<br>eigenschaft parallel<br>technologie realisier<br>framework | Entwurfsmuster und komponentenbasierte Systeme (0.93);<br>Entwurfsmuster und komponentenbasierte Systeme (0.93);<br>Verteilte Systeme (0.87); Verteilte Systeme (0.87);<br>Componentware (0.86); Verteilte Anwendungen (0.85);<br>Verteilte Anwendungen (0.85); Componentware (0.84);<br>Verteilte Anwendungen (0.83); Verteilte Systeme (0.82);                                                                                                                                       |
|                              | mobile applications design               | mobil anwend<br>wissensmanagement<br>entwickl method gestalt<br>usability design erstell<br>interaktion                  | Usability (0.93); Usability (0.93); Human Computer Interaction (0.89); Mobile Anwendungen und Systeme (0.84); Mobile Anwendungen und Systeme (0.84); Mobile Anwendungen (0.84); Mobile Anwendungen (0.84); Gestaltung interaktiver Plattformen (0.81); Mensch-Computer-Interaktion (0.79);<br>Mensch-Computer-Interaktion (0.79);                                                                                                                                                      |
|                              | IT security                              | itsich anwend verfahr<br>angriff itsystem security<br>praktisch datenschutz<br>technisch modell                          | Grundlagen IT-Sicherheit (0.94); Datenschutz und Datensicherheit (0.91); Datenschutz und Datensicherheit (0.91);<br>Informationssicherheit I (0.88); Network and Information Security 1 (0.87); Network and Information Security 1 (0.87);<br>Grundlagen IT-Sicherheit (0.87); IT-Sicherheit und IT-Recht 2 (0.85); Kryptologie (0.85); IT-Sicherheit (0.84);                                                                                                                          |
| Adjacent fields of knowledge | fundamentals of mathematics              | mathemat funktion linear<br>anwend algebra analysis<br>method informat<br>gleichungssystem<br>integralrechn              | Mathematik 2 (0.98); Mathematik 2 (0.98); Analysis 1 (0.97);<br>Analysis 1 (0.97); Lineare Algebra (0.97); Lineare Algebra (0.97);<br>Grundlagen der Mathematik für Informatiker (0.97);<br>Analysis / Wahrscheinlichkeitsrechnung (0.97); Mathematik 2: Analysis 2 mit Übungen (0.97); Mathematik 2: Analysis 2 mit Übungen (0.97);                                                                                                                                                   |
|                              | statistics                               | statist method dat anwend<br>verfahr verteil ergebnis<br>wahrscheinlichkeitsrechn<br>analys interpreti                   | Stochastik und Induktive Statistik (0.98); Wirtschaftsstatistik (0.98); Statistik I (0.96); Statistik II (0.96); Wirtschaftsstatistik (0.95);<br>Wirtschaftsstatistik (0.95); Wirtschaftsstatistik (0.95);<br>Wahrscheinlichkeitstheorie und Statistik 2 (0.95); Quantitative BWL - Marktforschung II (0.94); Mathematik III (Statistik) (0.94);                                                                                                                                       |
|                              | law                                      | recht rechtlich jurist<br>gesetz buerg<br>gesellschaftsrecht<br>wirtschaftsrecht method<br>grundzueg arbeitsrecht        | Recht für Nicht-Juristen (0.96); Wirtschaftsrecht (0.95); 1055 Grundzüge des Privatrechts (0.94); 1055 Grundzüge des Privatrechts (0.94);<br>Wirtschaftsrecht (0.94); Grundlagen der Rechtswissenschaften (0.94);<br>Recht für Wirtschaftsinformatiker (0.93); Recht I (0.93); Einführung in das nationale und europäische Recht (0.9);<br>Einführung in das nationale und europäische Recht (0.9);                                                                                    |
|                              | physics, engineering and medicine        | elektr definiert sensor<br>medizin berechn physikal<br>aufbau autonom steuer<br>stand                                    | Akustik (0.96); Akustik (0.96); Technische Mechanik (0.9);<br>Mess- und Prüftechnik (0.85); 1087 Sensortechnik (0.84);<br>Hydraulik und Pneumatik (0.84); 1091 Weltraumphysik (0.83);<br>Experimentalphysik II (0.83); 1084 Satellitennavigation I (0.82); 1073 Messtechnik (0.82);                                                                                                                                                                                                    |



|                                       |                                          |                                                                                                                                       |                                                                                                                                                                                                                                                                                                                                                                                                                                                                              |
|---------------------------------------|------------------------------------------|---------------------------------------------------------------------------------------------------------------------------------------|------------------------------------------------------------------------------------------------------------------------------------------------------------------------------------------------------------------------------------------------------------------------------------------------------------------------------------------------------------------------------------------------------------------------------------------------------------------------------|
| Application knowledge and soft skills | research methods                         | wissenschaft arbeit<br>method<br>wirtschaftsinformat<br>ergebnis selbststaend<br>bachelorarbeit diskussion<br>praesentation praesenti | Bachelor-Arbeit und –Abschlussprüfung (0.96); Bachelor-Arbeit und -kolloquium (0.95); Bachelor-Arbeit und -kolloquium (0.95); Bachelorseminar Wirtschaftsinformatik (0.95); Bachelor-Arbeit und -kolloquium (0.95); Masterseminar Wirtschaftsinformatik (0.95); Wissenschaftliche Arbeiten (0.94); Wissenschaftliches Arbeiten (0.94); Wirtschaftsinformatik-Seminar (0.94); Wirtschaftsinformatik-Seminar (0.94);                                                           |
|                                       | technology and implementation competence | simulation modellier<br>anwend praktisch beurteil<br>technik erstell<br>simulationsmodell<br>qualitaet struktur                       | Diskrete Simulation (0.74); Diskrete Simulation (0.74); Grundlagen der Fertigungstechnik (0.73); Entscheidungsmethoden in unternehmensweiten Softwaresystemen (0.72); Entscheidungsmethoden in unternehmensweiten Softwaresystemen (0.72); Organisationsentwicklung (0.7); Skizzieren und Freihandzeichnen (0.69); Organisationsentwicklung (0.67); Automatisierungstechnik I (0.57); Empirisch-probabilistische Verfahren (0.57);                                           |
|                                       | self-reliance and transfer competence    | praktisch theoret praxis<br>problem aktuell loesung<br>method analys wiss theori                                                      | Praxisstudium I (0.94); Praxisstudium II (0.94); Praxisstudium III (0.94); Praxisstudium IV (0.8); Praxisstudium V (0.8); Forschungsaspekte der Wirtschaftsinformatik I (0.73); Forschungsaspekte der Wirtschaftsinformatik II (0.73); Grundlagenmodul Steuerrecht (0.68); Angewandte Seminardidaktik (0.67); Train the Trainer (0.64);                                                                                                                                      |
|                                       | presentation techniques                  | kommunikation<br>praesentation rhetor<br>praesenti<br>selbstmanagement<br>feedback englisch<br>moderation grupp<br>vorbereit          | Rhetorik und Präsentation (Blockveranstaltung) (0.96); Business English Intensive Course Advanced (0.96); Social Skills (0.86); Rhetorik/Moderation (0.82); Kommunikation, Führung, Selbstmanagement (0.79); Kommunikation, Führung, Selbstmanagement (0.78); Kommunikation, Führung und Selbstmanagement (0.78); Kommunikation, Führung und Selbstmanagement (0.78); Rhetorik, Präsentations- und Moderationstechnik (0.78); Verhandlungs- und Moderationstechniken (0.72); |
|                                       | case studies                             | wiss anwend beurteil<br>komplex kritisch aktuell<br>selbstaend neu entwickeln<br>bewert                                               | Creative Programming (0.66); Enterprise Resource Planning (0.66); Informations- und Wissensmanagement (0.64); Organisation (0.63); Interaktive Wissensgewinnung (0.62); Steuerung der Unternehmens-IT (0.62); Business Intelligence (0.6); Handelsmanagement (0.59); CSCW und kollektive Intelligenz (0.57); Beschaffungsmarketing (0.57);                                                                                                                                   |
|                                       | project work                             | projekt team praesentation<br>praktisch projektarbeit<br>grupp arbeit umsetz<br>ergebnis loesung                                      | Wirtschaftsinformatik-Projekt (0.95); Wirtschaftsinformatik-Projekt (0.95); Wirtschaftsinformatik-Projekt (0.95); Wirtschaftsinformatik-Projekt (0.95); Projekt 2 (0.89); Projekt 2 (0.89); BI-Projekt (0.88); Wirtschaftsinformatikprojekt Einführung (0.81); Projektarbeit (0.79); Projektarbeit (0.79);                                                                                                                                                                   |
|                                       | analysis and evaluation competence       | anwend wiss analysi<br>bewert analys formal<br>design evalui technolog<br>algorithm                                                   | Anforderungsanalyse und Modellierung (0.97); Anforderungsanalyse und Modellierung (0.97); Organisationslehre (0.88); Organisationslehre (0.88); Organisationslehre (0.82); Einführung in die Wirtschaftsinformatik (0.76); Organisationslehre (0.75); IT-Outsourcing-Management (0.63); Internet-Management (0.54); Verteilt-kooperative Informationsverarbeitung (0.5);                                                                                                     |
|                                       | language and culture                     | englisch interkulturell<br>schriftlich sprach text<br>grammat fremdsprach<br>muendlich business<br>sprech                             | Sondergebiete Sprachen 1, 2 (0.97); English for Computer Scientists (0.97); Französisch 2 (0.97); Business English (0.97); English for Computer Scientists (0.96); Spanisch 2 (0.96); Französisch 1 (0.95); Business English I (0.95); Business English (0.93); Business English (0.92);                                                                                                                                                                                     |
|                                       | professional practice                    | sozial unternehm team<br>wiss entscheid beruf<br>grupp anwend denk<br>betrieb                                                         | Praxisprojekt (0.94); Praxis-Semester (0.94); Praxisprojekt (0.91); Praxisprojekt (0.91); Projektphase (0.91); Projektphase (0.91); Praxisphase IV (0.89); Praxisphase V (0.89); 1. Praxisphase (0.89); Praxisphase III (0.85);                                                                                                                                                                                                                                              |
